# Supplementary material
Source: Springer Nature journal article supplement (https://www.springermedizin.de/resource/supplementary/12978_2012_173_MOESM3_ESM.pdf/9602188)
Supplement: MOESM3 [file 9602188]

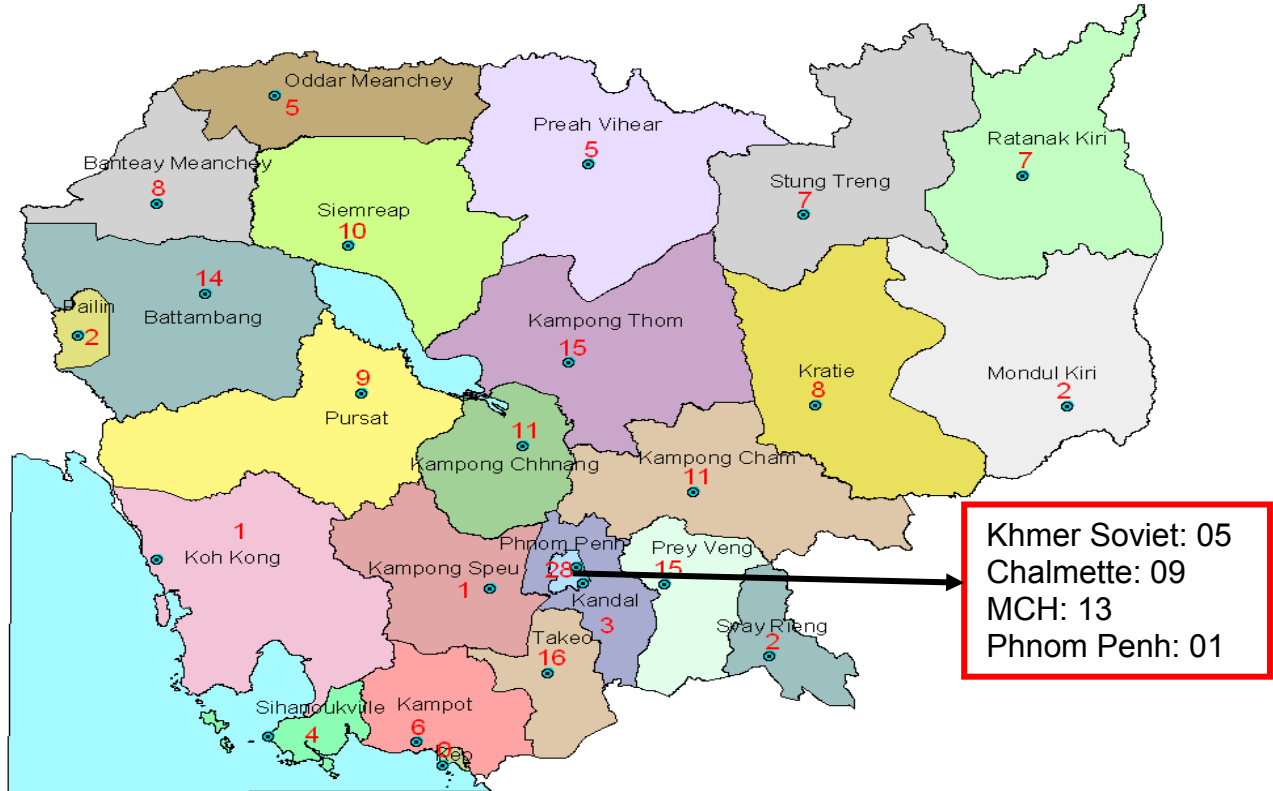

Source: Cambodia Maternal Mortality Surveillance Room, 2010  
(Courtesy of UNFPA country office in Cambodia)

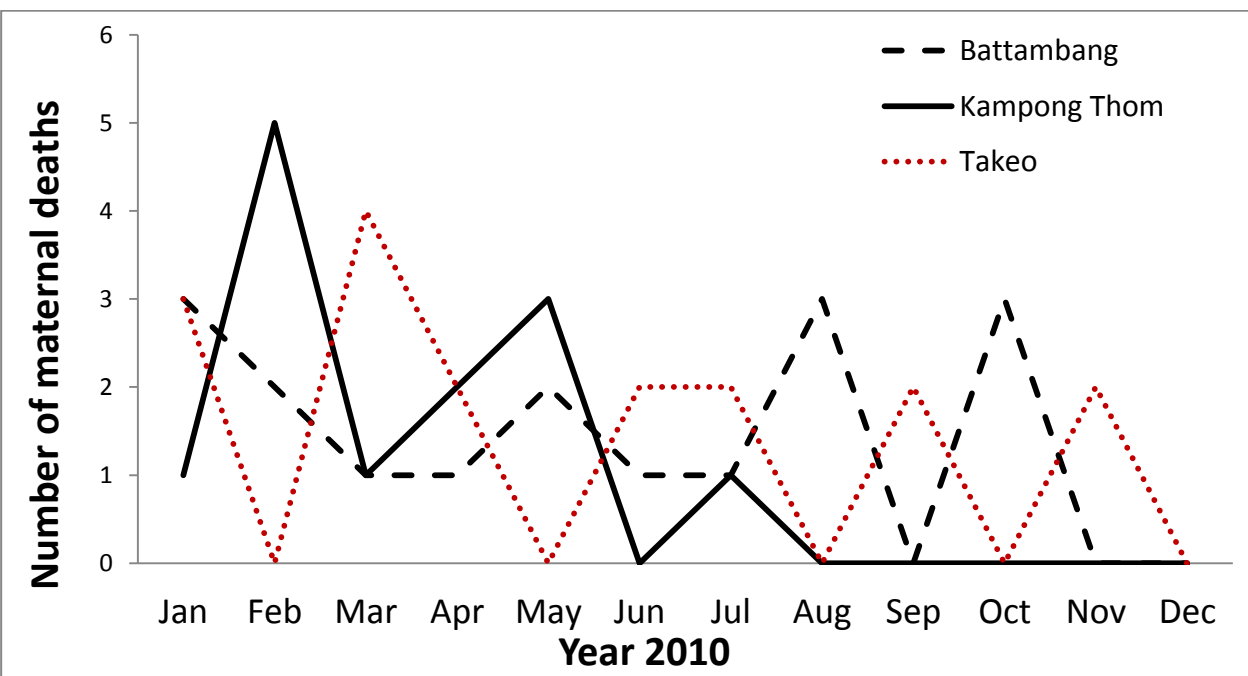

Trends of maternal deaths in three provinces in Cambodia, 2010
